# Supplementary material for: Association between Molar Incisor Hypomineralization in Schoolchildren and Both Prenatal and Postnatal Factors: A Population-Based Study
Source: PLoS One. 2016 Jun 9;11(6):e0156332. doi: 10.1371/journal.pone.0156332 (PMC4900662; doi:10.1371/journal.pone.0156332)
Supplement: S2 File — (PDF) [file pone.0156332.s002.pdf]

QUESTIONÁRIO ÀS MÃES RELATIVO AO ESTUDO DOS PRIMEIROS MOLARES  
PERMANENTES DE CRIANÇAS

**Obrigado por participar do nosso estudo!**

Sua participação vai nos ajudar a obter um melhor entendimento do que faz com que alguns dentes nasçam malformados em algumas crianças. Algumas perguntas são sobre a saúde do seu filho, do nascimento aos quatro anos de idade e outras sobre a saúde da mãe durante a gravidez. Por favor, pense cuidadosamente e tente responder da melhor forma que puder.

Nome da criança:.....

Nome da mãe:.....

1. Qual foi o peso do seu(a) filho(a) quando nasceu?

- ☐ Menos de 1,5 kg  
☐ De 1,5 kg a 2,49 kg  
☐ Mais de 2,5 kg  
☐ Não sei

2. Seu(a) filho(a) nasceu prematuro?

- ☐ Sim  
☐ Não  
☐ Não sei

Se você respondeu sim, com quantas semanas ele(a) nasceu?

- ☐ menos de 28 semanas  
☐ De 28 a menos de 32 semanas  
☐ De 32 a menos de 37  
☐ Não sei

3. Durante os dois últimos meses de gravidez, você teve:

- Proteinúria (perda de proteína pela urina)? ☐ Sim ☐ Não ☐ Não sei  
Glicosúria (perda de glicose/açúcar pela urina)? ☐ Sim ☐ Não ☐ Não sei  
Pressão alta? ☐ Sim ☐ Não ☐ Não sei  
Pré-eclâmpsia? ☐ Sim ☐ Não ☐ Não sei  
Outras doenças graves? ☐ Sim ☐ Não ☐ Não sei

Se você respondeu sim, quais foram as doenças graves?.....

.....

4. Durante os dois últimos meses de gravidez, você usou algum medicamento?

- ☐ Sim  
☐ Não  
☐ Não sei

Se você respondeu sim, marque com um X o medicamento usado:

- ☐ medicamento para pressão alta ( ex.: Aldomet, etc)  
☐ medicamento para “segurar” o bebê (ex.: Inibina, etc)  
☐ Paracetamol  
☐ Outro(s). Qual(is)?.....

5. Como foi o parto do seu(a) filho(a)?

- ☐ Natural  
☐ Cesárea programada  
☐ Cesárea de urgência  
☐ Não sei

6. Logo após o nascimento, seu(a) filho(a) precisou ser encaminhado para a UTI neonatal?

- ☐ Sim  
☐ Não  
☐ Não sei

7. Logo após o nascimento, seu(a) filho(a) precisou de algum tratamento médico especial?

- ☐ Sim
- ☐ Não
- ☐ Não sei

Se você respondeu sim, marque com um X o tratamento médico especial:

- ☐ Preciso de tratamento para icterícia (“amarelão”)
- ☐ Preciso de oxigênio com entubação
- ☐ Preciso de oxigênio sem entubação
- ☐ Outro. Qual?.....

### **Do nascimento até os 4 anos de idade**

8. Seu(a) filho(a) mamou no peito?

- ☐ Sim
- ☐ Não
- ☐ Não sei

Se você respondeu sim, por quanto tempo?

- ☐ Por menos de 6 meses
- ☐ Por 6 meses ou mais tempo
- ☐ Não sei

9. Seu(a) filho(a) usou mamadeira com leite?

- ☐ Sim
- ☐ Não
- ☐ Não sei

Se você respondeu sim, responda:

- Por quanto tempo? ☐ Por menos de 6 meses
- ☐ De 6 meses a 1 ano
  - ☐ Por mais de 1 ano
  - ☐ Não sei

O leite era aquecido? ☐ Sim

- ☐ Não
- ☐ Não sei

Como o leite era aquecido?

- ☐ No micro-ondas, dentro da mamadeira de plástico ou vasilha de plástico
- ☐ No micro-ondas dentro de mamadeira de vidro ou vasilha de vidro
- ☐ No fogão, em banho-maria, usando uma panela
- ☐ No fogão, direto na panela

10. Seu(a) filho(a) ficou doente do nascimento até os 4 anos de idade?

- ☐ Sim
- ☐ Não
- ☐ Não sei

Se você respondeu sim, marque com um X as doenças que seu(a) filho(a) teve:

- ☐ gripes ou resfriados
- ☐ Pneumonia
- ☐ Infecções respiratórias ( sinusite, infecção de garganta, faringite, etc.)
- ☐ Infecção de ouvido (otite)
- ☐ Outra (s). Qual(is)?.....

11. Seu(a) filho(a) usou medicamentos do nascimento até os 4 anos de idade?

- ☐ Sim
- ☐ Não
- ☐ Não sei

Se você respondeu sim, marque com um X os medicamentos que seu(a) filho(a) usou:

- ☐ Antibiótico (Amoxicilina, Clavulin, Amoxil, etc.)
- ☐ Analgésico/anti-térmico (Paracetamol, Dipirona, Melhoral, etc)
- ☐ Anti-inflamatórios (Nimesulida, Cataflan)

- ☐ Anti-alérgicos ou medicamentos para rinite  
☐ Outro(s). Qual(is)?.....

12. Seu(a) filho(a) foi internado em hospital do nascimento até os 4 anos de idade?

- ☐ Sim  
☐ Não  
☐ Não sei

Se você respondeu sim, marque com um X o motivo da internação:

- ☐ Pneumonia  
☐ Refluxo  
☐ Intoxicação com medicamento  
☐ Cirurgia  
☐ Outro(s). Qual(is)?.....

13. Seu(a) filho(a) apresentou febre alta (igual ou maior do que 38,5°C) do nascimento até os 4 anos de idade?

- ☐ Sim  
☐ Não  
☐ Não sei

14. Seu(a) filho(a) teve asma ou bronquite do nascimento até os 4 anos de idade?

- ☐ Sim  
☐ Não  
☐ Não sei

Se você respondeu sim, seu(a) filho(a) usou medicamentos? ☐ Sim  
☐ Não  
☐ Não sei

Se você respondeu sim, marque com um X o(s) medicamento (s) que seu(a) filho(a) usou:

- ☐ Berotec  
☐ Sabutamol ou aerolin  
☐ Prednisolona ou predsim  
☐ Acebrofilina  
☐ Outro(s). Qual(is)?.....

15. Seu(a) filho(a) tem algum parente com dentes que nasceram manchados?

- ☐ Sim  
☐ Não  
☐ Não sei

Se você respondeu sim, qual o parentesco com a criança?.....

16. Seu(a) filho(a) nasceu em Lavras?

- ☐ Sim  
☐ Não  
☐ Não sei

17. Seu(a) filho(a) morou em Lavras do nascimento até os 4 anos de idade?

- ☐ Sim  
☐ Não  
☐ Não sei

### Questionário socioeconômico e demográfico

Nome da criança \_\_\_\_\_

Data de nascimento: \_\_\_\_/\_\_\_\_/\_\_\_\_ Gênero: ( ) Masculino ( ) Feminino

Nome da Mãe: \_\_\_\_\_

Endereço: \_\_\_\_\_

Bairro: \_\_\_\_\_ Cidade: \_\_\_\_\_

Tel. \_\_\_\_\_

1- Estado civil da mãe:

☐ Solteira; ☐ Casada; ☐ Divorciada; ☐ Outro

2- Até que série a mãe da criança estudou? \_\_\_\_\_ série

3- Até que série o pai da criança estudou? \_\_\_\_\_ série

4- Qual é a renda mensal de seu grupo familiar? R\$ \_\_\_\_\_

5- Quantas pessoas, incluindo você próprio, vivem da renda mensal do seu grupo familiar?

☐ Duas;

☐ Três;

☐ Quatro;

☐ Cinco;

☐ Seis

☐ Sete ou mais. Coloque o número de pessoas: \_\_\_\_\_

6- Número de filhos

☐ Um; ☐ Dois; ☐ Três; ☐ Quatro; ☐ Cinco; ☐ Mais de cinco

7. Seu(a) filho(a) tem quantos irmãos mais velhos do que ele?

☐ Nenhum

☐ Um

☐ Dois

☐ Três

☐ Quatro ou mais
